# Supplementary material
Source: PubMed Central journal article supplement (PMC4298826)
Supplement: NIHMS654552-supplement-supplementary_materials.pdf [file NIHMS654552-supplement-supplementary_materials.pdf]

## Supplementary Materials for

### The ABA Receptor *PYL8* Promotes Lateral Root Growth by Enhancing *MYB77*-Dependent Transcription of Auxin-Responsive Genes

Yang Zhao, Lu Xing, Xingang Wang, Yueh-Ju Hou, Jinghui Gao, Pengcheng Wang, Cheng-Guo Duan, Xiaohong Zhu, Jian-Kang Zhu\*

\*Corresponding author. E-mail: jkzhu@purdue.edu

Published 3 June 2014, *Sci. Signal.* **7**, ra53 (2014)  
DOI: 10.1126/scisignal.2005051

#### The PDF file includes:

Fig. S1. *pyl8* mutants show no difference in root growth compared to wild type when exposed to NaCl or mannitol stress.

Fig. S2. Expression of stress-responsive genes in roots of *pyl8* mutant seedlings.

Fig. S3. Expression of *PYL8* in wild-type seedlings exposed to ABA.

Fig. S4. The interaction between *PYL8* and *MYB77* is not reduced by overexpression of *ABI1* or *ABI2*.

Fig. S5. The promoter region of auxin-regulated genes contains MBSI elements recognized by *MYB77* and *MYB44*.

Fig. S6. Sequence alignment of *MYB77* and its paralogs.

Fig. S7. *PYL8* enhances the abilities of *MYB44* and *MYB73* to activate *IAA19pro-LUC* expression in *abil-1* mutant protoplasts.

Table S1. Primers used for plasmid constructions.

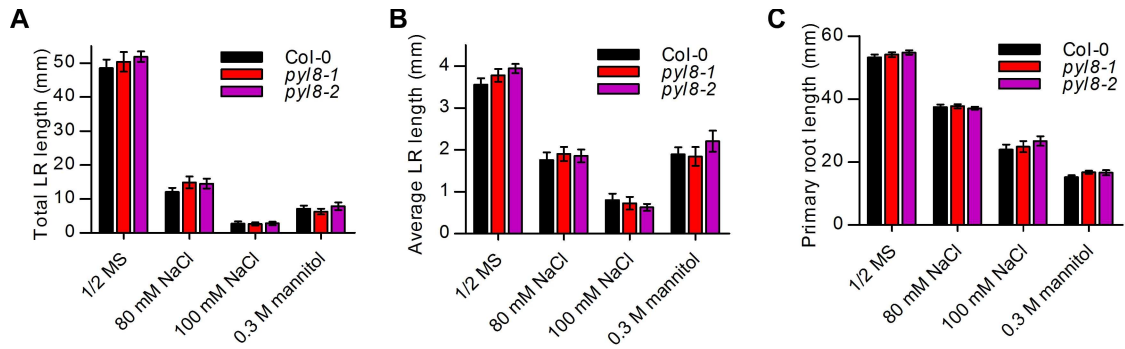

**Fig. S1. *pyl8* mutants show no difference in root growth compared to the wild type when exposed to NaCl or mannitol stress.** Lateral root length (A-B) and primary root length (C) of Col-0 and *pyl8* mutant seedlings at five dpt to media with or without NaCl or mannitol.  $N \geq 8$  seedlings. Data are mean  $\pm$  S.E.M.,  $*p < 0.05$ , Student's *t*-test.

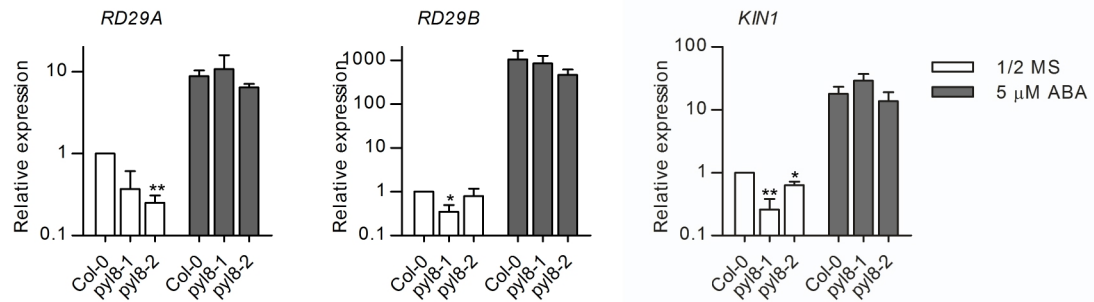

**Fig. S2. Expression of stress-responsive genes in roots of *pyl8* mutant seedlings.**

Quantitative RT-PCR was conducted on 3-day-old seedlings at 12 hour post transfer to media (1/2 MS, 1% sucrose) with or without 5 μM ABA. The expression levels of *RD29A*, *RD29B* and *KIN1* in Col-0 without ABA treatment were set as 1. N = 3 experiments. Data are mean ± S.E.M., \* $p < 0.05$ , \*\*  $p < 0.01$ , Student's *t*-test.

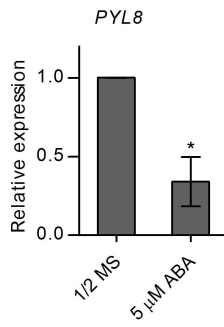

**Fig. S3. Expression of *PYL8* in wild-type seedlings exposed to ABA.** Quantitative RT-PCR was conducted on 3-day-old seedlings at 12 hour post transfer to media (1/2 MS, 1% sucrose) with or without 5 μM ABA. The expression level of *PYL8* in Col-0 without ABA treatment was set as 1. N = 3 experiments. Data are mean ± S.E.M., \* $p < 0.05$ , Student's *t*-test.

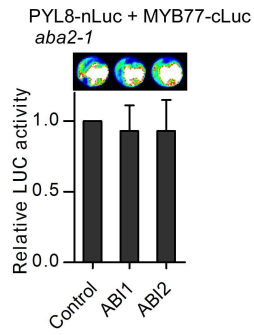

**Fig. S4. The interaction between PYL8 and MYB77 is not reduced by overexpression of ABI1 or ABI2.** PYL8-MYB77 interaction in LUC complementation assays in *aba2-1* mutant protoplasts with 5  $\mu$ M ABA. N = 6 experiments. Data are mean  $\pm$  S.E.M., \* $p$ <0.05, Student's *t*-test.

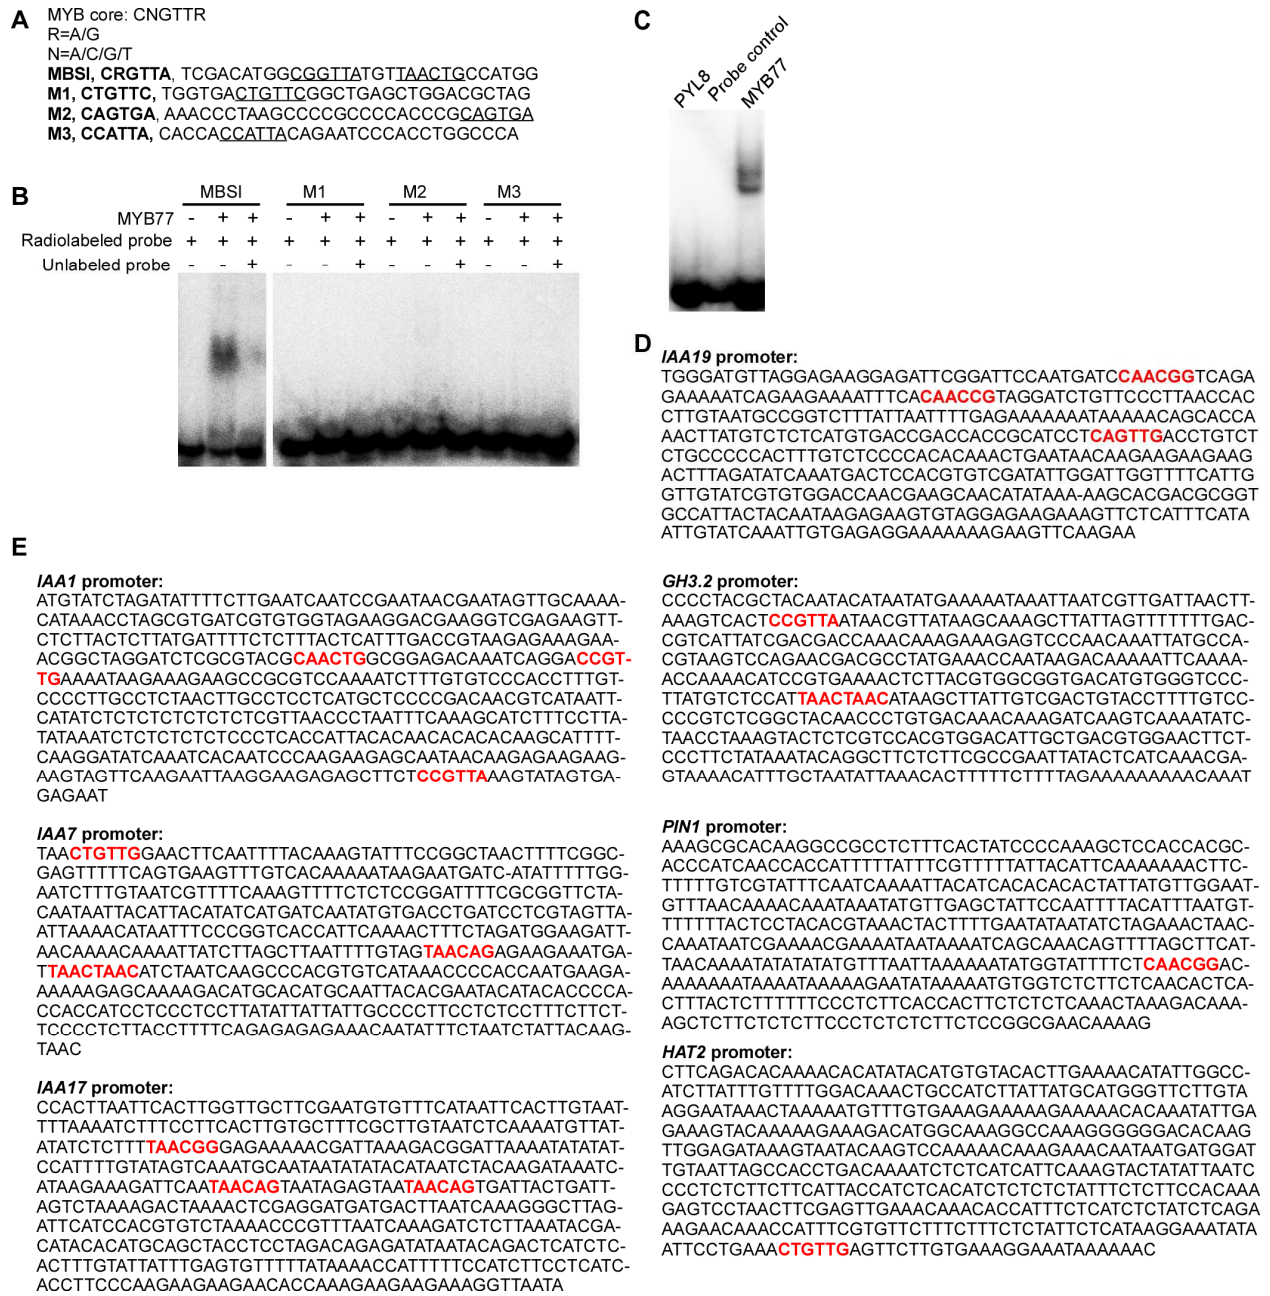

**Fig. S5. The promoter region of auxin-regulated genes contains MBSI elements recognized by MYB77 and MYB44.** (A) Oligonucleotides used in EMSA assay. Sequences of interest are underlined. (B) Binding between MYB77 and DNA oligonucleotides containing MBSI motif and mutated MBSI motif (M1-3) in EMSA assay. (C) Binding between MYB77 and MBSI motif-containing DNA oligonucleotides. (D) The 439-bp region of the translational start of *IAA19* is shown. MBSI elements are marked with red. (E) The 500-bp regions of the translational start of the indicated auxin-regulated genes are shown. MBSI and MBSII (GTTAGTTA) elements are marked with red.

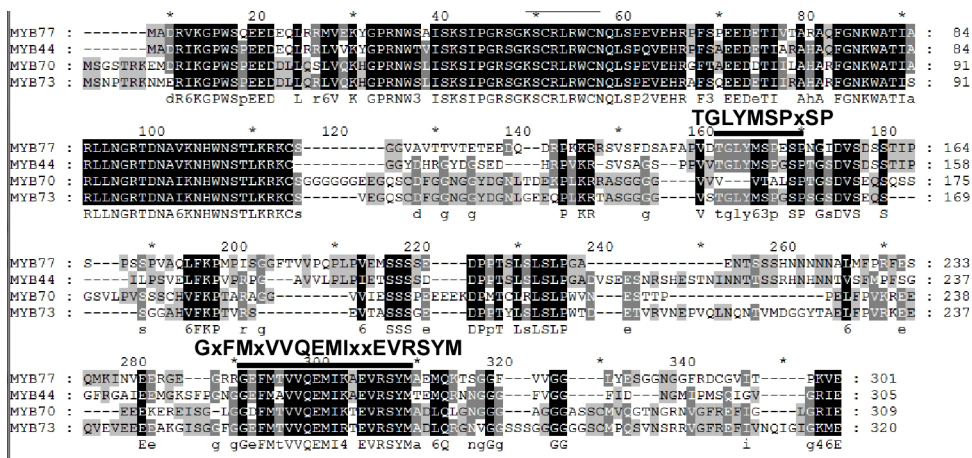

**Fig. S6. Sequence alignment of MYB77 and its paralogs.** MYB77, MYB44, MYB70 and MYB73 from *Arabidopsis* were aligned using ClustalX 2.0.5 with the default settings and were viewed using the GeneDoc software (<http://www.nrbc.org/gfx/genedoc/>). R2R3 MYB subgroup 22 contains two conserved motifs: TGLYMSPxSP and GxFMxVVQEMixxEVRSYM.

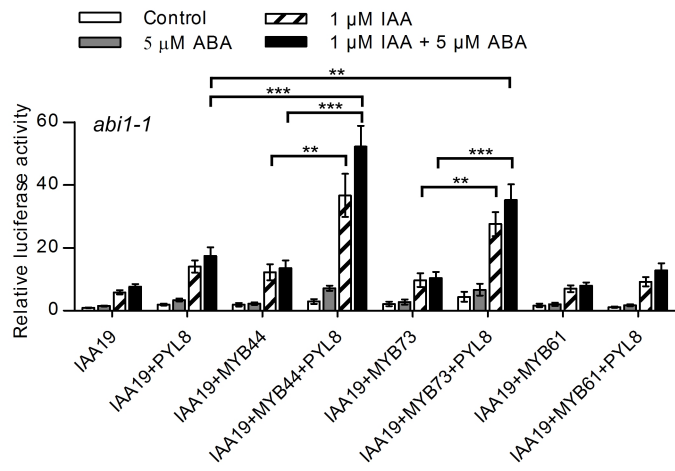

**Fig. S7. PYL8 enhances the abilities of MYB44 and MYB73 to activate *IAA19pro-LUC* expression in *abi1-1* mutant protoplasts.** *IAA19pro-LUC* expression in *abi1-1* mutant protoplasts co-transformed with the indicated combinations of *PYL8*, *MYB44*, *MYB73* and *IAA19pro-LUC* with varying concentration of ABA and IAA. N = 7 experiments. Data are mean  $\pm$  S.E.M., \*\* $p < 0.01$ , \*\*\* $p < 0.001$ , Student's *t*-test.



**Table S1. Primers used for plasmid constructions.**

| <b>Plasmids</b>     | <b>Forward primers</b>                                      | <b>Reverse primers</b>                                          |
|---------------------|-------------------------------------------------------------|-----------------------------------------------------------------|
| <i>IAA19pro-LUC</i> | <i>IAA19proF</i> :<br>AGAGGATCCTGGGATGTTAGGAGAAGGAGATTCG    | <i>IAA19proR</i> :<br>CTTCCATGGTTCTTGAACCTCTTTTTTTCCTCTCAC      |
| pHBT95-MYB44        | CGGCTCCCTCTCCCCTTGCTCCGTGGATCC<br>ATGGCTGATAGGATCAAAGGTCCAT | GTAGTCTGGAACGTCGTATGGGTAAGGCCT<br>CTACTCGATTCTCCCAACTCCAATTTGAC |
| pHBT95-MYB73-HA     | CGGCTCCCTCTCCCCTTGCTCCGTGGATCC<br>ATGTCAAACCCGACCCGTAAG     | GTAGTCTGGAACGTCGTATGGGTAAGGCCT<br>CTCCATCTTCCCAATTCCG           |
| pHBT95-MYB77        | CGGCTCCCTCTCCCCTTGCTCCGTGGATCC<br>ATGGCGGATCGTGTTAAAGG      | GTAGTCTGGAACGTCGTATGGGTAAGGCCT<br>CTACTCAACCTTAGGTGTTATTACTCC   |
| pHBT95-MYB61-HA     | CGGCTCCCTCTCCCCTTGCTCCGTGGATCC<br>ATGGGGAGACATTCTTGCTGTTAC  | GTAGTCTGGAACGTCGTATGGGTAAGGCCT<br>AAGGGACTGACCAAAAAGAGACG       |
| AD-MYB44            | GTCATATGGCCATGGAGGCCAGTGAATTC<br>ATGGCTGATAGGATCAAAGGTCCAT  | ATTCATCTGCAGCTCGAGCTCGATGGATCC<br>CTACTCGATTCTCCCAACTCCAATTTGAC |
| AD-MYB73            | GTCATATGGCCATGGAGGCCAGTGAATTC<br>ATGTCAAACCCGACCCGTAAG      | ATTCATCTGCAGCTCGAGCTCGATGGATCC<br>CTCCATCTTCCCAATTCCG           |
| AD-MYB77            | GTCATATGGCCATGGAGGCCAGTGAATTC<br>ATGGCGGATCGTGTTAAAGG       | ATTCATCTGCAGCTCGAGCTCGATGGATCC<br>CTACTCAACCTTAGGTGTTATTACTCC   |
| AD-MYB61            | GTCATATGGCCATGGAGGCCAGTGAATTC<br>ATGGGGAGACATTCTTGCTGTTAC   | ATTCATCTGCAGCTCGAGCTCGATGGATCC<br>CTAAAGGGACTGACCAAAAAGAGACG    |
| 6P1-MYB77           | GAAGTTCTGTTCCAGGGGCCCTGGGATCC<br>ATGGCGGATCGTGTTAAAGG       | ATGCGGCCGCTCGAGTCGACCCGGGAATTC<br>CTACTCAACCTTAGGTGTTATTACTCC   |
| pET28a-PYL8         | ATCGGATCC ATGGAAGCTAACGGGATTG                               | ATCGAATTC CTATAGTCTCGGGGTGAAG                                   |
| pENTR-MYB77         | CACCATGGCGGATCGTGTTAAAGG                                    | CTCAACCTTAGGTGTTATTACTCC                                        |
| cLUC-ABI1           | CAGATCTCGTACGCGTCCCGGGCGGATCC<br>ATGGAGGAAGTATCTCCGGC       | TGTTTGAACGATCTGCAGTCTAGAGTCGACTTA<br>TCAGTTCAAGGGTTTGCTCTTG     |
